# Supplementary material for: Simple kinetic relationships and nonspecific competition govern nuclear import rates in vivo
Source: PubMed Central journal article supplement — J Cell Biol. 2006 Nov 20;175(4):579–93. doi: 10.1083/jcb.200608141 (PMC2064595; doi:10.1083/jcb.200608141), 2006-11-20
Supplement: jcellbiol_jcb.200608141_1.pdf [file jcellbiol_jcb.200608141_1.pdf]

Timney et al., <http://www.jcb.org/cgi/content/full/jcb.200608141/DC1>

## Supplemental materials and methods

### Identification of Kap123p-binding proteins by overlay assay

Kap123p–cargo interactions were identified in HPLC separations of yeast nuclear proteins (Rout and Blobel, 1993; Rout et al., 1997) by overlay assays, exactly as we described for the identification of Kap121p cargoes (Leslie et al., 2002, 2004). Kap123p recognized a distinct pattern of proteins, as compared with those recognized by the karyopherins Kap104p, Kap121p, and Kap95p/Kap60p (Fig. S1). Comparison of the profiles of molecular weights of proteins recognized by these four transport factors showed that Kap123p prefers proteins with molecular weights 20 amino acids, rich in lysine and arginine, with few acidic residues, and frequently terminated at one or both ends by prolines or glycines. If these sequences caused a nuclear accumulation of GFP fusion proteins that was sensitive to the transport poison mixture (see import assay), they were defined as putative NLSs and taken for further study. In all five cases, such NLSs were defined (Table I and Fig. S3). Indeed, independent research on YRA1 confirmed the region selected by these criteria to be its single NLS (Zenklusen et al., 2001).

As cargoes can share transport pathways (Leslie et al., 2004), we tested whether import of each fusion protein was dependent on Kap123p (Fig. S3). The test chosen was whether the N/C ratio of each NLS-GFP was significantly altered in  $\Delta kap123$  yeast compared with the wild type strain. Control experiments showed no significant decrease in N/C ratio for known non-Kap123p cargoes in  $\Delta kap123$  yeast (e.g., Pho4NLS-GFP).

As previously stated (Figs. 2 and 3), both ribosomal NLS fusion proteins (Rpl25NLS-GFPp and Rps1bNLS-GFPp) proved to be profoundly mislocalized in the absence of Kap123p. In contrast, three of the four nonribosomal NLS-GFP cargoes were mislocalized to lesser (although highly statistically significant) extents in  $\Delta kap123$  yeast (Fig. 3).

### Plasmid construction

All plasmids used in this study are briefly described with details of restriction sites used in Table S1. Plasmids were constructed by standard recombinant DNA methods (Sambrook and Russell, 2001). Genes were amplified from *S. cerevisiae* genomic DNA by PCR, using primers encoding appropriate restriction sites. PCR products were trapped in TA Cloning vector (Invitrogen) and subcloned into the appropriate plasmid for expression in yeast or bacteria.

The bacterial expression plasmid encoding the GST-GFP fusion protein was a gift from J. Rosenblum (ActivX BioSciences, Inc., La Jolla, CA).

NLSs were used as previously defined for *RPL25* (Schaap et al., 1991) and *NAB2* (Lee and Aitchison, 1999). Observation of the sequence surrounding the proposed NLS of *PHO4* (Kaffman et al., 1998) indicated that the full extent of the NLS might be greater than previously described. Indeed, inclusion of a lysine-rich sequence downstream of the initially described NLS (Table I) significantly increased the nuclear accumulation of *PHO4NLS-GFP* well beyond that expected by simply increasing cargo size. The distribution of the expanded Pho4NLS fusion protein continued to be fully dependent on Kap121p

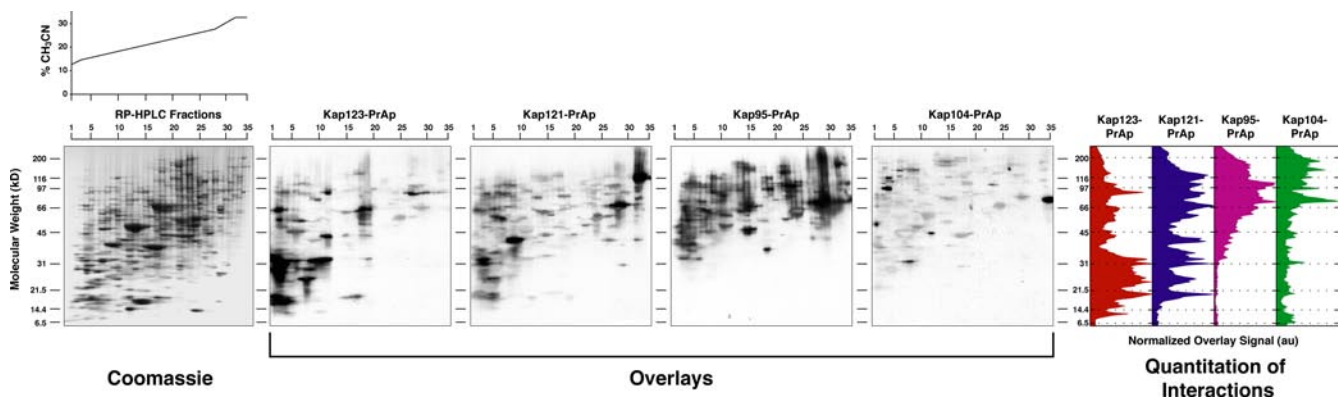

Figure S1. **Kap123p interacts with a distinct subset of small nuclear proteins.** (left) Yeast nucleoplasmic proteins were resolved by reverse-phase HPLC using a gradient of acetonitrile with the profile illustrated in the top left graph. Resulting fractions were separated by SDS-PAGE and stained with Coomassie blue. (middle) Proteins from unstained gels were transferred to nitrocellulose and probed in an overlay assay with cytosol from the indicated KAP-PrA strains. Kap-PrA binding was detected using chemiluminescent detection of the PrA tag. (right) The intensity of binding down the entire molecular weight range of each overlay blot was summed for all fractions, divided by the corresponding Coomassie staining profile, and normalized to a maximum value of 1.

Table S1. **Plasmids**

| Descriptive name             | Formal name | Construction                                                                                                                                                                      | Source                      |
|------------------------------|-------------|-----------------------------------------------------------------------------------------------------------------------------------------------------------------------------------|-----------------------------|
| pYX242                       | pYX242      | 2 $\mu$ yeast constitutive expression plasmid (TPI1 promotor)                                                                                                                     | Novagen/R&D Systems         |
| eGFP                         | pEGFP3      | eGFP ORF inserted downstream of HindIII in pYX242                                                                                                                                 | J. Aitchison                |
| RPL25NLS-GFP                 | pBT008      | NLS of RPL25 (bp 1–135) fused upstream of eGFP in EcoRI–Sall of pYX242                                                                                                            | This study                  |
| RPS1BNLS-GFP                 | pBT013      | NLS of RPS1B (bp 1–150) inserted upstream of eGFP in EcoRI–HindIII of pEGFP3                                                                                                      | This study                  |
| MAK16NLS-GFP                 | pBT015      | NLS of MAK16 (bp 799–861) fused upstream of eGFP in BamHI–Sall of pYX242                                                                                                          | This study                  |
| NUG1NLS-GFP                  | pBT017      | NLS of NUG1 (bp 1–183) inserted upstream of eGFP in EcoRI–HindIII of pEGFP3                                                                                                       | This study                  |
| YIL096CNLS-GFP               | pBT022      | NLS of YIL096C (bp 1–202) inserted upstream of eGFP in BamHI–HindIII of pEGFP3                                                                                                    | This study                  |
| YRA1NLS-GFP                  | pBT023      | NLS of YRA1 (bp 40–210) inserted upstream of eGFP in EcoRI–HindIII of pEGFP3                                                                                                      | This study                  |
| RPL25NLS-GFP-PRA             | pBT009      | NLS of RPL25 (bp 1–135) fused upstream of eGFP in EcoRI–HindIII of pYX242, followed by a single PrA repeat in HindIII–Sall                                                        | This study                  |
| RPL25NLS-YFP                 | pBT011      | NLS of RPL25 (bp 1–120) fused upstream of eYFP in EcoRI–Sall of pYX242                                                                                                            | This study                  |
| NAB2NLS-GFP-PRA              | pBT016      | NLS of NAB2 (bp 601–750) inserted in EcoRI–BamHI, eGFP inserted downstream in BamHI–HindIII, and a single PrA repeat inserted further downstream in HindIII–Sall of pYX242        | This study                  |
| PHO4NLS-GFP-PRA              | pBT018      | NLS of PHO4 (bp 421–588) inserted in EcoRI–BamHI, eGFP inserted downstream in BamHI–HindIII, and a single PrA repeat inserted further downstream in HindIII–Sall of pYX242        | This study                  |
| PHO4NLS-YFP                  | pBT031      | NLS of PHO4 (bp 421–588) inserted in EcoRI–HindIII and eYFP inserted downstream in HindIII–Sall of pYX242                                                                         | This study                  |
| NAB2NLS-GFP                  | pBT032      | NLS of NAB2 (bp 601–750) inserted upstream of eGFP in EcoRI–HindIII of pEGFP3                                                                                                     | This study                  |
| rpl25NLS-GFP (K21A K22A)     | pBT012      | K21A and K22A mutations introduced into RPL25NLS in pBT008 by site-directed mutagenesis                                                                                           | This study                  |
| pYEX-BX                      | pYEX-BX     | 2 $\mu$ yeast copper-inducible (CUP1 promotor) expression plasmid                                                                                                                 | CLONTECH Laboratories, Inc. |
| pYEX-BX (leu2 URA3)          | pBT024      | Early frameshift mutation introduced into LEU2 of pYEX-BX by cutting with BstEII, blunt ending, and religating the vector back together                                           | This study                  |
| KAP95-HA                     | pBT025      | KAP95 fused upstream of two HA tags in BamHI–Sall of pBT024                                                                                                                       | This study                  |
| KAP104-HA                    | pBT026      | KAP104 fused upstream of two HA tags in BamHI–Sall of pBT024                                                                                                                      | This study                  |
| KAP121-HA                    | pBT027      | KAP121 fused upstream of two HA tags in BamHI–Sall of pBT024                                                                                                                      | This study                  |
| KAP123-HA                    | pBT028      | KAP123 fused upstream of two HA tags in Sall of pBT024                                                                                                                            | This study                  |
| KAP121-CFP                   | pBT029      | KAP121 inserted in BamHI–Sall of pBT024; CFP was then inserted in MluI–AvrII encoded by the KAP121 3' PCR primer                                                                  | This study                  |
| KAP123-CFP                   | pBT030      | KAP123 inserted in Sall of pBT024; CFP was then inserted in MluI–AvrII encoded by the KAP121 3' PCR primer                                                                        | This study                  |
| RPL25NLS-GFP-HIS             | pJN001      | RPL25NLS-GFP amplified from pBT001, with Asel and Sall sites engineered into upstream and downstream PCR primers respectively; fragment inserted into NdeI–Sall of pET21b         | This study                  |
| rpl25NLS-GFP-HIS (K21A K22A) | pJN002      | Mutated rpl25NLS-GFP amplified from pBT009, with Asel and Sall sites engineered into upstream and downstream PCR primers respectively; fragment inserted into NdeI–Sall of pET21b | This study                  |
| PHO4NLS-YFP-HIS              | pJN003      | PHO4NLS-YFP from pBT031 in NdeI–Sall of pET21b                                                                                                                                    | This study                  |
| NAB2NLS-GFP-HIS              | pJN004      | NAB2NLS-GFP amplified from pBT032, with Asel and Sall sites engineered into upstream and downstream PCR primers respectively; fragment inserted into NdeI–Sall of pET21b          | This study                  |
| GST-GFP                      | GST-GFP     | GFP ORF in Sall–NotI of pGEX-4T3                                                                                                                                                  | J. Rosenblum                |
| GST-KAP104                   | GST-KAP104  | KAP104 in BamHI of pGEX-2TK                                                                                                                                                       | Lee and Aitchison, 1999     |
| GST-KAP121                   | GST-KAP121  | KAP121 in BamHI–XhoI of pGEX-4T1                                                                                                                                                  | Marelli et al., 1998        |
| GST-KAP123                   | pJN005      | KAP123-HA from pBT028 in Sall of pGEX-4T3                                                                                                                                         | This study                  |

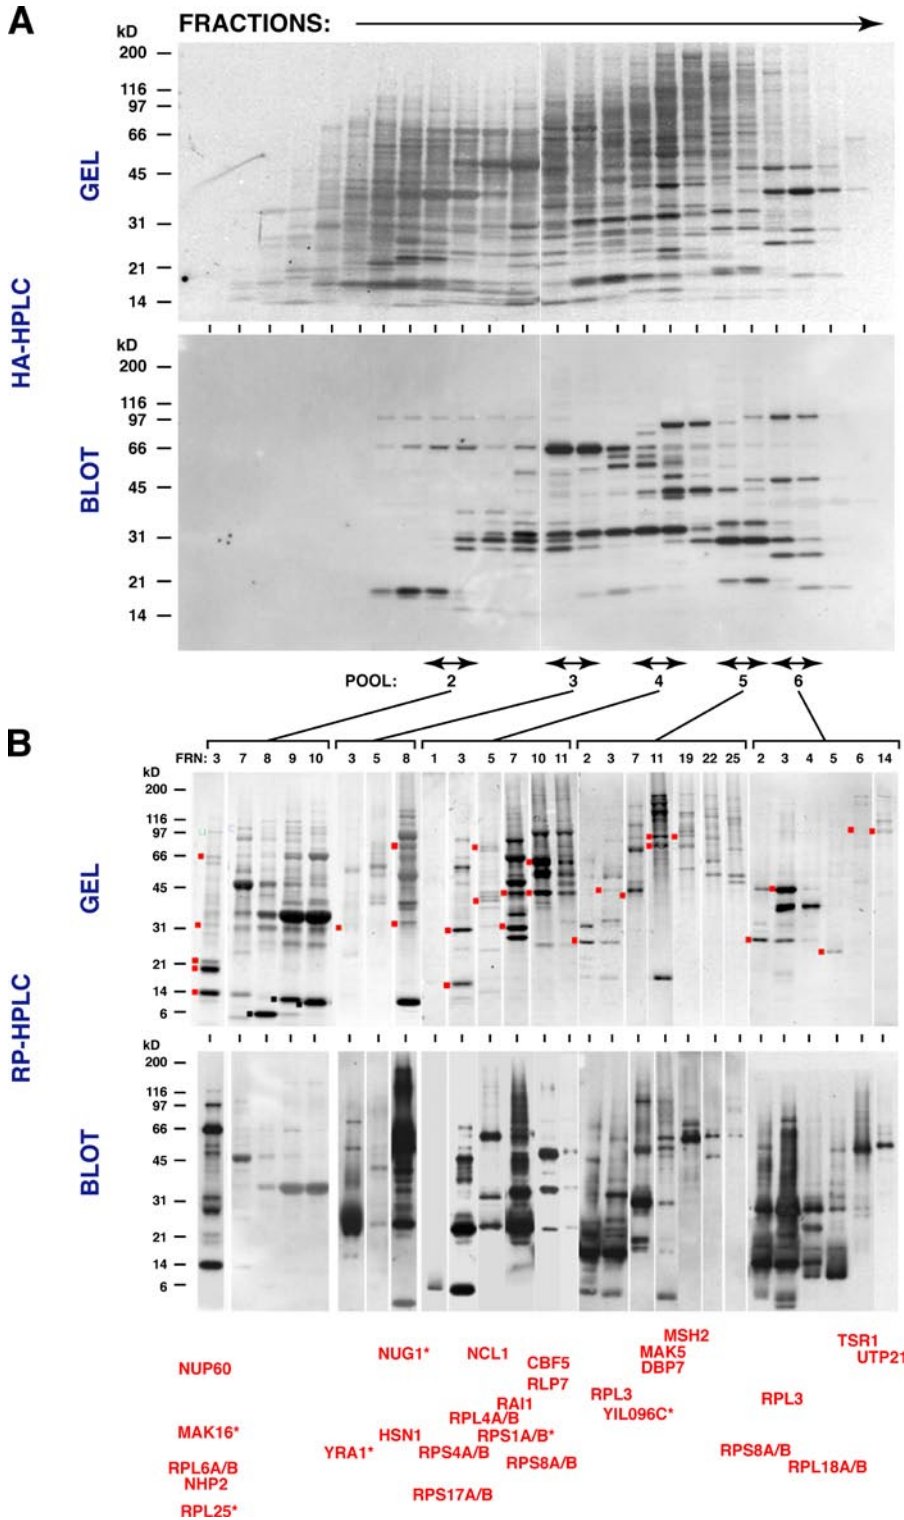

Figure S2. **The identities of Kap123p-interacting proteins were determined from overlay assays.** (A) Yeast nucleoplasm was fractionated by hydroxylapatite-HPLC, the fractions were separated by SDS-PAGE, and the resulting gels were transferred to nitrocellulose and stained with Amido black (top) before being probed for binding to Kap123-PrAp by overlay assay as before (bottom). (B) Fractions of the HA-HPLC separation that indicated a large number of interactions with Kap123p were pooled. Each pool was then fractionated further by reverse-phase HPLC and, finally, separated by SDS-PAGE. Overlay assays were once again performed from these blots to determine which protein bands bound strongly to Kap123p (red squares). The identities of these Kap123p-interacting proteins were determined by mass spectrometry of the corresponding bands (bottom). Those proteins that were selected for further investigation are marked with asterisks.

for its import (experiments in *kap121* temperature-sensitive yeast). The primary sequences of each of the NLSs used are given in Table I.

All NLS-GFP yeast expression constructs were made in the pYX242 backbone (Novagen; discontinued) that constitutively expresses genes at a high level under the *TP11* promoter. The smaller NLSs of *RPL25* and *MAK16* were encoded into PCR primers for eGFP, but the larger NLS sequences of *RPS1B*, *NAB2*, *PHO4*, *MAK16*, *NUG1*, *YIL096c*, and *YRA1* were cloned by PCR and subcloned into appropriate pYX242 derivatives. *RPL25NLS*, *NAB2NLS*, and *PHO4NLS* were cloned as NLS-GFP constructs that optionally had an additional 174-bp repeat of PrA added to their C termini. *RPL25NLS* was also cloned as a fusion protein to eYFP (CLONTECH Laboratories, Inc.), which was otherwise identical to the eGFP version.

Table S2. **Strains**

| Description                             | Formal name | Genotype                                                                                                                                                               | Source                                                         |
|-----------------------------------------|-------------|------------------------------------------------------------------------------------------------------------------------------------------------------------------------|----------------------------------------------------------------|
| WT                                      | DF5a        | <i>MA<math>\alpha</math> trp1-1 ura3-52 his3-<math>\Delta</math>200 leu2-3,112 lys2-801 gal</i>                                                                        | Finley et al., 1987                                            |
| $\Delta$ kap123 (URA3)                  | MRY001      | <i>MA<math>\alpha</math> trp1-1 ura3-52 his3-<math>\Delta</math>200 leu2-3,112 lys2-801 gal kap123::URA3</i>                                                           | Rout et al., 1997                                              |
| $\Delta$ kap123 (TRP1)                  | BTY001      | <i>MA<math>\alpha</math> trp1-1 ura3-52 his3-<math>\Delta</math>200 leu2-3,112 lys2-801 gal <math>\Delta</math>kap123::ura3::TRP1</i>                                  | TRP1 marker swap for URA3 of MRY001                            |
| KAP104-GFP                              | KAP104-GFP  | <i>MA<math>\alpha</math> his3<math>\Delta</math>1 leu2<math>\Delta</math>0 met15<math>\Delta</math>0 ura3<math>\Delta</math>0 KAP104-GFP::HIS3MX6</i>                  | Invitrogen; Huh et al., 2003                                   |
| KAP121-GFP                              | KAP121-GFP  | <i>MA<math>\alpha</math> his3<math>\Delta</math>1 leu2<math>\Delta</math>0 met15<math>\Delta</math>0 ura3<math>\Delta</math>0 KAP121-GFP::HIS3MX6</i>                  | Invitrogen; Huh et al., 2003                                   |
| KAP123-GFP                              | KAP123-GFP  | <i>MA<math>\alpha</math> his3<math>\Delta</math>1 leu2<math>\Delta</math>0 met15<math>\Delta</math>0 ura3<math>\Delta</math>0 KAP123-GFP::HIS3MX6</i>                  | Invitrogen; Huh et al., 2003                                   |
| KAP95-GFP                               | KAP95-GFP   | <i>MA<math>\alpha</math> his3<math>\Delta</math>1 leu2<math>\Delta</math>0 met15<math>\Delta</math>0 ura3<math>\Delta</math>0 KAP95-GFP::HIS3MX6</i>                   | Invitrogen; Huh et al., 2003                                   |
| KAP95-PRA                               | MRY002      | <i>MA<math>\alpha</math> trp1-1 ura3-52 his3-<math>\Delta</math>200 leu2-3,112 lys2-801 gal KAP95-PRA::HIS3::URA3</i>                                                  | Rout et al., 1997                                              |
| KAP104-PRA                              | MRY003      | <i>MA<math>\alpha</math> trp1-1 ura3-52 his3-<math>\Delta</math>200 leu2-3,112 lys2-801 gal KAP104-PRA::HIS3::URA3</i>                                                 | Aitchison et al., 1996                                         |
| KAP121-PRA                              | MRY004      | <i>MA<math>\alpha</math> trp1-1 ura3-52 his3-<math>\Delta</math>200 leu2-3,112 lys2-801 gal KAP121-PRA::HIS3::URA3</i>                                                 | Rout et al., 1997                                              |
| KAP123-PRA                              | MRY005      | <i>MA<math>\alpha</math> trp1-1 ura3-52 his3-<math>\Delta</math>200 leu2-3,112 lys2-801 gal KAP123-PRA::HIS3::URA3</i>                                                 | Rout et al., 1997                                              |
| HTB2-CFP                                | BTY002      | <i>MA<math>\alpha</math> trp1-1 ura3-52 his3-<math>\Delta</math>200 leu2-3,112 lys2-801 gal HTB2-CFP::HIS3MX</i>                                                       | HTB2 C-terminus tagged with CFP in DF5                         |
| TPI1-CFP                                | BTY003      | <i>MA<math>\alpha</math> trp1-1 ura3-52 his3-<math>\Delta</math>200 leu2-3,112 lys2-801 gal TPI1-CFP::HIS3MX</i>                                                       | TPI1 C terminus tagged with CFP in DF5                         |
| WT-Import $\alpha$                      | BTY004      | <i>MA<math>\alpha</math> trp1-1 ura3-52 his3-<math>\Delta</math>200 leu2-3,112 lys2-801 gal TPI1-CFP::HIS3MX HTB2-CFP::HIS3MX</i>                                      | Segregant of tetrad resulting from mating of BTY002 and BTY003 |
| WT-Import $\alpha$                      | BTY005      | <i>MA<math>\alpha</math> trp1-1 ura3-52 his3-<math>\Delta</math>200 leu2-3,112 lys2-801 gal TPI1-CFP::HIS3MX HTB2-CFP::HIS3MX</i>                                      | Segregant of tetrad resulting from mating of BTY002 and BTY003 |
| $\Delta$ kap123-Import $\alpha$         | BTY006      | <i>MA<math>\alpha</math> trp1-1 ura3-52 his3-<math>\Delta</math>200 leu2-3,112 lys2-801 gal HTB2-CFP::HIS3MX TPI1-CFP::HIS3MX kap123::ura3::TRP1</i>                   | Segregant of tetrad resulting from mating of BTY005 and BTY001 |
| RPL25NLS-GFP $\Delta$ kap123            | BTY009      | <i>MA<math>\alpha</math> trp1-1 ura3-52 his3-<math>\Delta</math>200 leu2-3,112 lys2-801 gal <math>\Delta</math>kap123::ura3::TRP1 pBT008 (LEU2)</i>                    | BTY001 transformed with pBT008                                 |
| rpl25nls-GFP (K21A K22A) WT             | BTY010      | <i>MA<math>\alpha</math> trp1-1 ura3-52 his3-<math>\Delta</math>200 leu2-3,112 lys2-801 gal pBT012 (LEU2)</i>                                                          | DF5a transformed with pBT012                                   |
| RPL25NLS-GFP WT                         | BTY011      | <i>MA<math>\alpha</math> trp1-1 ura3-52 his3-<math>\Delta</math>200 leu2-3,112 lys2-801 gal pBT008 (LEU2)</i>                                                          | DF5a transformed with pBT008                                   |
| RPL25NLS-GFP-PRA $\Delta$ kap123        | BTY012      | <i>MA<math>\alpha</math> trp1-1 ura3-52 his3-<math>\Delta</math>200 leu2-3,112 lys2-801 gal <math>\Delta</math>kap123::ura3::TRP1 pBT009 (LEU2)</i>                    | BTY001 transformed with pBT009                                 |
| RPL25NLS-GFP-PRA $\Delta$ kap123-Import | BTY013      | <i>MA<math>\alpha</math> trp1-1 ura3-52 his3-<math>\Delta</math>200 leu2-3,112 lys2-801 gal HTB2-CFP::HIS3MX TPI1-CFP::HIS3MX kap123::ura3::TRP1 pBT009 (LEU2)</i>     | BTY006 transformed with pBT009                                 |
| RPL25NLS-GFP-PRA WT-Import              | BTY014      | <i>MA<math>\alpha</math> trp1-1 ura3-52 his3-<math>\Delta</math>200 leu2-3,112 lys2-801 gal TPI1-CFP::HIS3MX HTB2-CFP::HIS3MX pBT009 (LEU2)</i>                        | BTY004 transformed with pBT009                                 |
| RPL25NLS-YFP KAP121-CFP $\Delta$ kap123 | BTY015      | <i>MA<math>\alpha</math> trp1-1 ura3-52 his3-<math>\Delta</math>200 leu2-3,112 lys2-801 gal <math>\Delta</math>kap123::ura3::TRP1 pBT011 (LEU2) pBT029 (leu2 URA3)</i> | BTY001 transformed with pBT011 and pBT029                      |
| RPL25NLS-YFP KAP123-CFP $\Delta$ kap123 | BTY016      | <i>MA<math>\alpha</math> trp1-1 ura3-52 his3-<math>\Delta</math>200 leu2-3,112 lys2-801 gal <math>\Delta</math>kap123::ura3::TRP1 pBT011 (LEU2) pBT030 (leu2 URA3)</i> | BTY001 transformed with pBT011 and pBT030                      |
| RPS1BNLS-GFP $\Delta$ kap123            | BTY017      | <i>MA<math>\alpha</math> trp1-1 ura3-52 his3-<math>\Delta</math>200 leu2-3,112 lys2-801 gal <math>\Delta</math>kap123::ura3::TRP1 pBT013 (LEU2)</i>                    | BTY001 transformed with pBT013                                 |
| RPS1BNLS-GFP WT                         | BTY018      | <i>MA<math>\alpha</math> trp1-1 ura3-52 his3-<math>\Delta</math>200 leu2-3,112 lys2-801 gal pBT013 (LEU2)</i>                                                          | DF5a transformed with pBT013                                   |
| MAK16-NLS-GFP $\Delta$ kap123           | BTY022      | <i>MA<math>\alpha</math> trp1-1 ura3-52 his3-<math>\Delta</math>200 leu2-3,112 lys2-801 gal <math>\Delta</math>kap123::ura3::TRP1 pBT015 (LEU2)</i>                    | BTY001 transformed with pBT015                                 |
| MAK16-NLS-GFP WT                        | BTY023      | <i>MA<math>\alpha</math> trp1-1 ura3-52 his3-<math>\Delta</math>200 leu2-3,112 lys2-801 gal pBT015 (LEU2)</i>                                                          | DF5a transformed with pBT015                                   |
| PHO4NLS-GFP-PRA WT-Import               | BTY024      | <i>MA<math>\alpha</math> trp1-1 ura3-52 his3-<math>\Delta</math>200 leu2-3,112 lys2-801 gal TPI1-CFP::HIS3MX HTB2-CFP::HIS3MX pBT018 (LEU2)</i>                        | BTY004 transformed with pBT018                                 |
| NAB2NLS-GFP-PRA WT-Import               | BTY025      | <i>MA<math>\alpha</math> trp1-1 ura3-52 his3-<math>\Delta</math>200 leu2-3,112 lys2-801 gal TPI1-CFP::HIS3MX HTB2-CFP::HIS3MX pBT016 (LEU2)</i>                        | BTY004 transformed with pBT016                                 |
| RPL25NLS-GFP Vector $\Delta$ kap123     | BTY027      | <i>MA<math>\alpha</math> trp1-1 ura3-52 his3-<math>\Delta</math>200 leu2-3,112 lys2-801 gal <math>\Delta</math>kap123::ura3::TRP1 pBT024 (leu2 URA3) pBT008 (LEU2)</i> | BTY001 transformed with pBT024 and pBT008                      |
| RPL25NLS-GFP KAP95-HA $\Delta$ kap123   | BTY028      | <i>MA<math>\alpha</math> trp1-1 ura3-52 his3-<math>\Delta</math>200 leu2-3,112 lys2-801 gal <math>\Delta</math>kap123::ura3::TRP1 pBT025 (leu2 URA3) pBT008 (LEU2)</i> | BTY001 transformed with pBT025 and pBT008                      |
| RPL25NLS-GFP KAP104-HA $\Delta$ kap123  | BTY029      | <i>MA<math>\alpha</math> trp1-1 ura3-52 his3-<math>\Delta</math>200 leu2-3,112 lys2-801 gal <math>\Delta</math>kap123::ura3::TRP1 pBT026 (leu2 URA3) pBT008 (LEU2)</i> | BTY001 transformed with pBT025 and pBT008                      |
| RPL25NLS-GFP KAP121-HA $\Delta$ kap123  | BTY030      | <i>MA<math>\alpha</math> trp1-1 ura3-52 his3-<math>\Delta</math>200 leu2-3,112 lys2-801 gal <math>\Delta</math>kap123::ura3::TRP1 pBT027 (leu2 URA3) pBT008 (LEU2)</i> | BTY001 transformed with pBT027 and pBT008                      |
| RPL25NLS-GFP KAP123-HA $\Delta$ kap123  | BTY031      | <i>MA<math>\alpha</math> trp1-1 ura3-52 his3-<math>\Delta</math>200 leu2-3,112 lys2-801 gal <math>\Delta</math>kap123::ura3::TRP1 pBT028 (leu2 URA3) pBT008 (LEU2)</i> | BTY001 transformed with pBT028 and pBT008                      |

Table S3. List of all Kap123p-interacting proteins from overlay assays

| Gene name            | Kap123p binding <sup>a</sup> | Kap121p binding <sup>a</sup> | Function <sup>b</sup>  |
|----------------------|------------------------------|------------------------------|------------------------|
| RPL18A               | ++++                         | ++                           | Ribosomal protein      |
| RPL18B               | ++++                         | ++                           | Ribosomal protein      |
| RPL25 <sup>c</sup>   | ++                           | ++                           | Ribosomal protein      |
| RPL3                 | ++++                         | ++++                         | Ribosomal protein      |
| RPL4A                | ++                           | ++                           | Ribosomal protein      |
| RPL4B                | ++                           | ++                           | Ribosomal protein      |
| RPL6A                | ++                           | ++                           | Ribosomal protein      |
| RPL6B                | ++                           | ++                           | Ribosomal protein      |
| RPS17A               | ++                           | +                            | Ribosomal protein      |
| RPS17B               | ++                           | +                            | Ribosomal protein      |
| RPS1A                | +++                          | +                            | Ribosomal protein      |
| RPS1B <sup>c</sup>   | +++                          | +                            | Ribosomal protein      |
| RPS4A                | +++                          | +++                          | Ribosomal protein      |
| RPS4B                | +++                          | +++                          | Ribosomal protein      |
| RPS8A                | ++++                         | +++                          | Ribosomal protein      |
| RPS8B                | ++++                         | +++                          | Ribosomal protein      |
| CBF5                 | +++                          | +++                          | Ribosome assembly      |
| DBP7                 | +                            | +                            | Ribosome assembly      |
| MAK16 <sup>c</sup>   | +++                          | ++                           | Ribosome assembly      |
| MAK5                 | +                            | +                            | Ribosome assembly      |
| NHP2                 | +                            | +                            | Ribosome assembly      |
| NOC2                 | ++++                         | +++                          | Ribosome assembly      |
| NUG1 <sup>c</sup>    | +++                          | +                            | Ribosome assembly      |
| RLP7                 | ++                           | ++                           | Ribosome assembly      |
| TSR1                 | ++                           | +                            | Ribosome assembly      |
| YIL096C <sup>c</sup> | +++                          | +                            | Ribosome assembly      |
| RAI1                 | +++                          | +                            | RNA processing         |
| UTP21                | ++                           | +                            | RNA processing         |
| CTR9                 | +                            | +                            | Transcription          |
| RPG1                 | +                            | +                            | Translation initiation |
| NCL1                 | ++                           | +                            | tRNA modification      |
| YHR127W              | +++                          | +                            | Unknown                |
| MSH2                 | +++                          | +++                          | DNA repair             |
| SSB2                 | +++                          | +                            | Heat shock protein     |
| MKT1                 | ++++                         | ++                           | Mating                 |
| ADE12                | +++                          | +                            | Metabolic enzyme       |
| YRA1 <sup>c</sup>    | ++++                         | +                            | mRNA export            |
| NIC96                | ++++                         | ++                           | NPC protein            |
| NUP60                | +++                          | +                            | NPC protein            |

<sup>a</sup>Relative strength of Kap-binding signal estimated from overlay assays.

<sup>b</sup>As listed at the Yeast Proteome Database (<http://www.biobase-international.com/>).

<sup>c</sup>Chosen for further study.

Kap overexpression constructs were made under the *CUP1* promoter, in a variant of the pYEX-BX 2 $\mu$  yeast expression vector (CLONTECH Laboratories, Inc.). This vector had been modified by the introduction of a frameshift mutation early in the *LEU2* marker gene, leaving only a functional *URA3* auxotrophic marker. Thus, these vectors could be cotransformed into cells with the *LEU2*-marked NLS-GFP expression vectors. *KAP95*, *KAP104*, *KAP121*, and *KAP123* were cloned with two HA tags encoded in their 3' PCR primers and inserted into modified pYEX-BX. *KAP121* and *KAP123* were made as eCFP-tagged (CLONTECH Laboratories, Inc.) versions by encoding a cloning site in their 3' PCR primers for insertion of eCFP.

Lysine-to-alanine mutations were introduced at amino acids 21 and 22 of *RPL25NLS-GFP* using the QuikChange II XL Site Directed Mutagenesis kit (Stratagene).

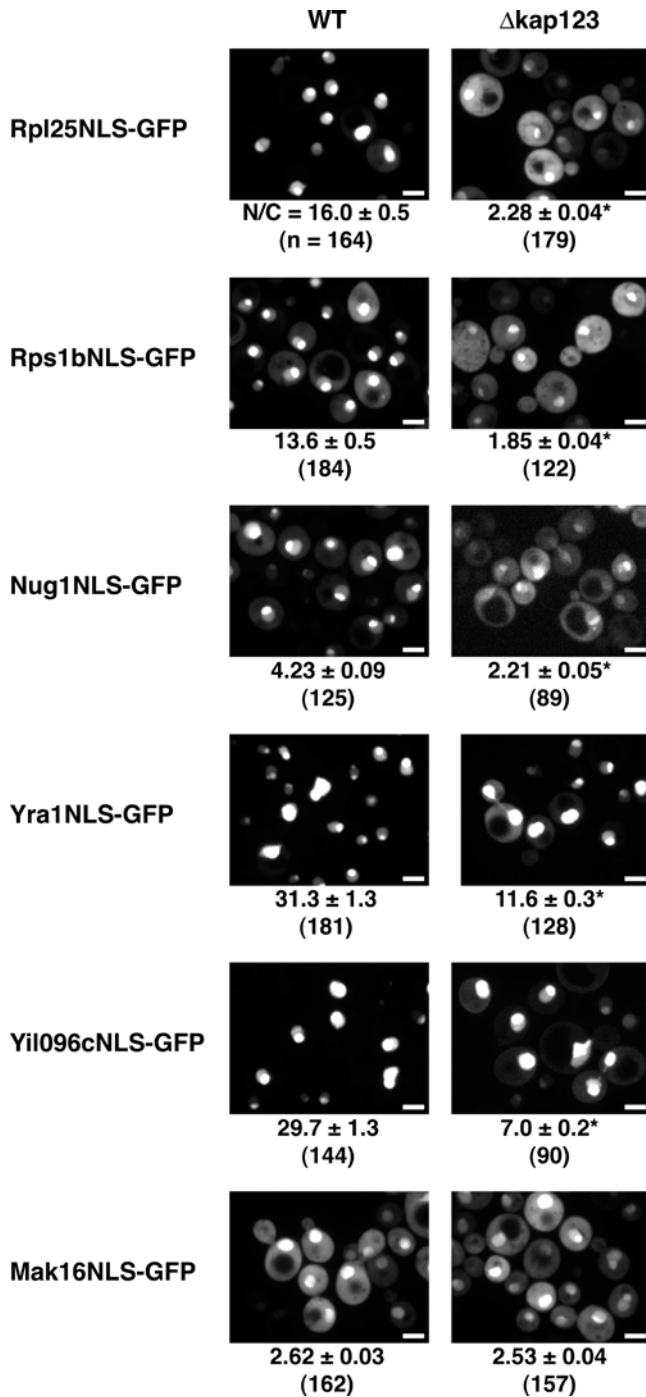

**Figure S3. Steady-state distributions of ribosomal NLS-GFP cargoes are significantly altered in  $\Delta kap123$  yeast.** NLSs of six putative Kap123p cargoes (Table 1) were expressed as NLS-GFP fusion proteins from 2 $\mu$  plasmids in wild-type or  $\Delta kap123$  yeast. Fluorescence images of the resulting steady-state distributions of these cargoes are shown. Bars, 3  $\mu$ m. The average nuclear-to-cytoplasmic ratio of each cargo in either strain was calculated from images of several cells, with uncertainty values of the SD of the mean. Cargoes that had a significantly different ratio in  $\Delta kap123$  cells than wild-type cells (*t* test P value of <0.0001) are marked with asterisks.

Plasmids containing *GST-KAP104* (Marelli et al., 1998) and *GST-KAP121* (Lee and Aitchison, 1999) were gifts from J. Aitchison (University of Washington, Seattle, WA), whereas *GST-KAP123-HA* was made for this study; all were constructed in pGEX vectors (GE Healthcare). Wild-type and mutant *RPL25NLS-GFP*, *NAB2NLS-GFP*, and *PHO4NLS-YFP* constructs were amplified by PCR from their respective yeast expression plasmids and inserted into pET21b (Novagen) for bacterial expression and purification as 6xHIS-tagged fusion proteins.

### Strain construction

All strains and their derivations are described in Table S3.

The *URA3* marker of  $\Delta kap123$  was changed to *TRP1* by transforming with the appropriate marker-swap plasmid (Cross, 1997). This allowed  $\Delta kap123$  yeast to be transformed with *URA3*-marked Kap-expression vectors.

“Import” strains were constructed by standard C-terminal-tagging methodology (Aitchison et al., 1995). Genomic copies of *HTB2* and *TPH1* were tagged separately with a *CFP::HIS3MX* cassette that was a gift from A. Neiman (State University of New York, Stony Brook, NY; Nickas and Neiman, 2002). The WT-Import strain was made by mating *HTB2-CFP* and *TPH1-CFP* tagged strains, then selecting for haploid spores with the expected subcellular fluorescence distribution. The  $\Delta kap123$ -Import strain was made by similar mating and selection, crossing the WT-Import strain with  $\Delta kap123::TRP1$ .

All transformations were performed using the standard electroporation method (Grey and Brendel, 1992).

### References

- Aitchison, J.D., G. Blobel, and M.P. Rout. 1996. Kap104p: a karyopherin involved in the nuclear transport of messenger RNA binding proteins. *Science*. 274:624–627.
- Aitchison, J.D., M.P. Rout, M. Marelli, G. Blobel, and R.W. Wozniak. 1995. Two novel related yeast nucleoporins Nup170p and Nup157p: complementation with the vertebrate homologue Nup155p and functional interactions with the yeast nuclear pore-membrane protein Pom152p. *J. Cell Biol.* 131:1133–1148.
- Cross, F.R. 1997. ‘Marker swap’ plasmids: convenient tools for budding yeast molecular genetics. *Yeast*. 13:647–653.
- Grey, M., and M. Brendel. 1992. A ten-minute protocol for transforming *Saccharomyces cerevisiae* by electroporation. *Curr. Genet.* 22:335–336.
- Huh, W.K., J.V. Falvo, L.C. Gerke, A.S. Carroll, R.W. Howson, J.S. Weissman, and E.K. O’Shea. 2003. Global analysis of protein localization in budding yeast. *Nature*. 425:686–691.
- Kaffman, A., N.M. Rank, and E.K. O’Shea. 1998. Phosphorylation regulates association of the transcription factor Pho4 with its import receptor Pse1/Kap121. *Genes Dev.* 12:2673–2683.

- Leslie, D.M., W. Zhang, B.L. Timney, B.T. Chait, M.P. Rout, R.W. Wozniak, and J.D. Aitchison. 2004. Characterization of karyopherin cargoes reveals unique mechanisms of Kap121p-mediated nuclear import. *Mol. Cell. Biol.* 24:8487–8503.
- Nickas, M.E., and A.M. Neiman. 2002. Ady3p links spindle pole body function to spore wall synthesis in *Saccharomyces cerevisiae*. *Genetics*. 160:1439–1450.
- Rout, M.P., and G. Blobel. 1993. Isolation of the yeast nuclear pore complex. *J. Cell Biol.* 123:771–783.
- Sydorsky, Y., D.J. Dilworth, E.C. Yi, D.R. Goodlett, R.W. Wozniak, and J.D. Aitchison. 2003. Intersection of the Kap123p-mediated nuclear import and ribosome export pathways. *Mol. Cell. Biol.* 23:2042–2054.
- Timmers, A.C., R. Stuger, P.J. Schaap, J. van 't Riet, and H.A. Raue. 1999. Nuclear and nucleolar localization of *Saccharomyces cerevisiae* ribosomal proteins S22 and S25. *FEBS Lett.* 452:335–340.
